1 **Title: An insula-central amygdala circuit for behavioral inhibition**

2

3 **Abbreviated title: A circuit for behavioral inhibition**

4

5 **Authors:** Hillary Schiff<sup>1</sup>§, Anna Lien Bouhuis<sup>1,2</sup>, Kai Yu<sup>1</sup>, Mario A. Penzo<sup>1</sup>§, Haohong  
6 Li<sup>1</sup>§, Miao He<sup>3</sup>, Bo Li<sup>1, #</sup>

7

8 **Affiliations:**

9 1. Cold Spring Harbor Laboratory, Cold Spring Harbor, NY11724, USA.

10 2. Swammerdam Institute for Life Sciences, Center for Neuroscience, University of  
11 Amsterdam, 1098 XH, Amsterdam, the Netherlands.

12 3. Institutes of Brain Science, State Key Laboratory of Medical Neurobiology,  
13 Collaborative Innovation Center for Brain Science, Fudan University, Shanghai  
14 200032, China.

15

16 § Current address: Stony Brook University (H.S.), Unit on the Neurobiology of Affective  
17 Memory, National Institute of Mental Health, Bethesda, MD 20892, USA (M.P.),  
18 Huazhong University of Science and Technology, Wuhan 430074, China (H.L.).

19

20 **# Corresponding author:**

21 Bo Li, PhD

22 1 Bungtown Road

23 Cold Spring Harbor NY 11724

24 Email: [bli@csih.edu](mailto:bli@csih.edu)

25

26 **Number of pages:** 34

27 **Number of figures:** 6

28 **Number of words** for Abstract: 221; Introduction: 760; and Discussion: 730.

29 **Total number of words:** 9,105

30 **Conflict of Interest:** The authors declare no competing financial interests.

31 **Acknowledgements:**

32 We thank A. Fontanini (Stony Brook University, USA) for critical reading of an early  
33 version of the manuscript, J. Johansen (RIKEN Brain Science Institute, Japan) for helpful  
34 discussions, P. Wulff (University of Kiel, Germany) for kindly providing the  
35 AAV.CAG.Flex.TeLC-eGFP plasmid, and members of the Li laboratory for discussions.

36 This work was supported by grants from NARSAD (23169, B.L.), National Natural  
37 Science Foundation of China (81428010, B.L. and M.H.), National Institutes of Mental  
38 Health (R01MH101214, B.L.), Wodcroft Foundation (B.L.), Stanley Family Foundation  
39 (B.L.), Simons Foundation Autism Research Initiative (344904, SFARI) (B.L.), and  
40 Human Frontier Science Program (RGP0015, B.L.).

41

42 **Abstract**

43 Predicting which substances are suitable for consumption during foraging is critical for  
44 animals to survive. While food-seeking behavior is extensively studied, the neural circuit  
45 mechanisms underlying avoidance of potentially poisonous substances remain poorly  
46 understood. Here we examined the role of the insular cortex (IC) to central amygdala  
47 (CeA) circuit in the establishment of such avoidance behavior. Using anatomic tracing  
48 approaches combined with optogenetics-assisted circuit mapping, we found that the  
49 gustatory region of the IC sends direct excitatory projections to the lateral division of the  
50 CeA (CeL), making monosynaptic excitatory connections with distinct populations of  
51 CeL neurons. Specific inhibition of neurotransmitter release from the CeL-projecting IC  
52 neurons prevented mice from acquiring the “no-go” response, while leaving the “go”  
53 response largely unaffected in a tastant (sucrose/quinine)-reinforced “go/no-go” task.  
54 Furthermore, selective activation of the IC-CeL pathway with optogenetics drove  
55 unconditioned lick suppression in thirsty animals, induced aversive responses, and was  
56 sufficient to instruct conditioned action suppression in response to a cue predicting the  
57 optogenetic activation. These results indicate that activity in the IC-CeL circuit is  
58 necessary for establishing anticipatory avoidance responses to an aversive tastant, and is  
59 also sufficient to drive learning of such anticipatory avoidance. This function of the IC-  
60 CeL circuit is likely important for guiding avoidance of substances with unpleasant tastes  
61 during foraging in order to minimize the chance of being poisoned.

62

63 **Significance Statement**

64 The ability to predict which substances are suitable for consumption is critical for  
65 survival. Here we found that activity in the insular cortex (IC) to central amygdala (CeA)  
66 circuit is necessary for establishing avoidance responses to an unpleasant tastant, and is  
67 also sufficient to drive learning of such avoidance responses. These results suggest that  
68 the IC-CeA circuit is critical for behavioral inhibition in anticipation of potentially  
69 poisonous substances during foraging.

70

## 71 **Introduction**

72 The ability to suppress actions that can lead to harmful consequences is critical for  
73 survival. For example, animals, including humans, stop consummatory behavior when  
74 encountering food or liquid with an unpleasant taste, which indicates the existence of a  
75 potentially poisonous substance. Animals are also capable of learning to use  
76 environmental cues (such as an odor, color, location or context) to predict unpleasant  
77 properties (such as a bitter taste, toxicity) of a substance, and subsequently using these  
78 predictive cues to guide avoidance of the substance during foraging. While food  
79 approaching and reward seeking behaviors are extensively studied (Balleine, 2005, 2011;  
80 Kelley, 2004), the neural circuit mechanisms that underlie innate and learned suppression  
81 of actions that may lead to food poisoning, or aversive consequences in general, are  
82 poorly understood.

83

84 The insular cortex (IC), including the gustatory cortex (GC), plays an important role in  
85 processing taste and visceral information (Accolla and Carleton, 2008; Katz et al., 2001;  
86 Samuelsen and Fontanini, 2017; Yamamoto et al., 1985). The IC is also engaged in

87 various learning tasks, especially when learning to associate a neutral tastant (also known  
88 as a conditioned stimulus, CS) with an intrinsically aversive stimulus (also known as an  
89 unconditioned stimulus, US), or to associate a non-gustatory CS with an appetitive or  
90 aversive tastant US (Bermudez-Rattoni, 2004; Kusumoto-Yoshida et al., 2015; Vincis  
91 and Fontanini, 2016; Yasoshima and Yamamoto, 1998). In one such task, a “go/no-go”  
92 task in which auditory “go” and “no-go” CSs predict the delivery of sucrose and quinine,  
93 respectively, specific CS-evoked responses develop in the IC as rats learn the predictive  
94 value of each CS (Gardner and Fontanini, 2014). IC neurons also show CS-evoked  
95 responses in a conditioned food-approaching task (Kusumoto-Yoshida et al., 2015).  
96 These findings indicate that associative learning driven by gustatory reinforcement  
97 induces plastic changes in the IC, and suggest that the IC may participate in guiding  
98 approach or avoidance responses during feeding or foraging behaviors. Consistently,  
99 pharmacological and optogenetic inhibition of the IC impairs conditioned food  
100 approaching behavior (Kusumoto-Yoshida et al., 2015). Nevertheless, whether the IC is  
101 also essential for avoidance of aversive tastes remains unknown.

102

103 The central nucleus of the amygdala (CeA), including its lateral division (CeL), is a  
104 prominent downstream structure of the IC. As it is also a direct recipient of taste  
105 information from the brainstem (Carter et al., 2013), the CeA is anatomically positioned  
106 to process convergent taste information. Indeed, it has been shown that the CeA encodes  
107 taste identification and palatability, responses that follow those in the IC (Sadacca et al.,  
108 2012). These findings suggest that the CeA may process and use the information  
109 originating from the IC to influence taste-motivated behaviors.

110

111 The CeL plays an important role in the learning and expression of defensive behaviors  
112 (Ciocchi et al., 2010; Goosens and Maren, 2003; Li et al., 2013; Wilensky et al., 2006), as  
113 well as in reward-related behaviors and feeding (Gallagher et al., 1990; Kentridge et al.,  
114 1991; Kim et al., 2017; Robinson et al., 2014; Seo et al., 2016). For instance, previous  
115 studies showed that the somatostatin-expressing (SOM<sup>+</sup>) subpopulation of neurons in the  
116 CeL is essential for the acquisition and expression of conditioned freezing and action  
117 suppression (Fadok et al., 2017; Li et al., 2013; Yu et al., 2016). The protein kinase C- $\delta$ -  
118 expressing (PKC- $\delta$ <sup>+</sup>) CeL neurons, on the other hand, participate in conveying aversive  
119 US information, drive avoidance response, and are sufficient to instruct aversive learning  
120 (Yu et al., 2017). Furthermore, it has been shown that CeA neurons, including PKC- $\delta$ <sup>+</sup>  
121 CeL neurons, are critical for suppression of feeding behavior (Cai et al., 2014; Petrovich  
122 et al., 2009). As the CeL is a major direct downstream target of the IC, these findings  
123 point to the possibility that the IC controls learning or expression of taste-motivated  
124 behavioral inhibition through the IC-CeL circuit.

125

126 To test this hypothesis, we used anatomical, electrophysiological, and circuit based  
127 manipulation approaches. We found that an excitatory monosynaptic connection exists  
128 between the posterior division of the IC and the CeL in mice, and that activation of the  
129 IC-CeL pathway excites specific subtypes of neurons within the CeL. Notably, selective  
130 inhibition of CeL-projecting IC neurons specifically impairs the conditioned inhibitory  
131 response to a cue predicting an aversive tastant. Furthermore, activation of the IC-CeL  
132 circuit with optogenetics produces a powerful suppression of ongoing licking behavior in

133 thirsty mice, induces avoidance behavior, and is sufficient to instruct conditioned lick  
134 suppression. These results reveal an important role of the IC-CeL circuit in the  
135 establishment of anticipatory behavioral inhibition, in particular the inhibition of  
136 consummatory behavior in response to cues predicting an unpleasant taste.

137

## 138 **Materials and Methods**

### 139 **Animals**

140 Before surgery, mice were group-housed under a 12-h light-dark cycle (7 a.m. to 7 p.m.  
141 light) with food and water freely available. The *Som-cre* (Taniguchi et al., 2011), *Ail4*  
142 (Madisen et al., 2010), *Prkcd-cre* (Haubensak et al., 2010), and *Rosa26-stop<sup>fllox</sup>-tTA* (Li et  
143 al., 2010) mice were described previously and were purchased from the Jackson  
144 Laboratory. All mice were bred onto C57BL/6J genetic background. The *Som-cre;Ail4*  
145 mice, which were heterozygous for both the Cre allele and the Lox-Stop-Lox-tdTomato  
146 allele, were bred by crossing homozygous *Som-cre* mice with homozygous *Ail4* reporter  
147 mice. Male mice of 40–80 d of age were used for behavioral and anatomical experiments.  
148 Male and female mice of 35-45 d of age were used for *in vitro* slice physiology  
149 experiments. Behavioral experiments were performed during the light cycle. All  
150 procedures involving animals were approved by the Institute Animal Care and Use  
151 Committees of Cold Spring Harbor Laboratory and carried out in accordance with US  
152 National Institutes of Health standards.

153

### 154 **Viral vectors**

155 Most of the adeno-associated viruses (AAV) were produced by the University of North  
156 Carolina vector core facility or the University of Pennsylvania vector core and have  
157 previously been described (Ahrens et al., 2015; Penzo et al., 2015; Stephenson-Jones et  
158 al., 2016; Yu et al., 2016): AAV9-Ef1a-DIO-eYFP, AAV9-Ef1a-DIO-hChR2(H134R)-  
159 eYFP, AAV9-CAG-ChR2-GFP, AAV9.CAG.Flex.TeLC-eGFP.WPRE.bGH, and AAV-  
160 TRE-hGFP-TVA-G. The AAV8.2-hEF1 $\alpha$ -DIO-synaptophysin-mCherry was produced by  
161 the MIT Viral Gene Transfer Core. The EnvA-pseudotyped, protein-G-deleted rabies-  
162 EnvA-SAD- $\Delta$ G-mCherry virus was produced by the Viral Vector Core Facility at Salk  
163 Institute (Penzo et al., 2015). CAV2-Cre was purchased from Montpellier vector platform  
164 (Plateforme de Vectorologie de Montpellier (PVM), Biocampus Montpellier,  
165 Montpellier, France) (Penzo et al., 2015; Stephenson-Jones et al., 2016). All viral vectors  
166 were stored in aliquots at  $-80^{\circ}\text{C}$  until use.

167

## 168 **Histology**

169 Animals were deeply anesthetized and transcardially perfused with PBS, followed by  
170 perfusion with 4% paraformaldehyde (PFA) in PBS. Brains were dissected out and  
171 postfixed in 4% PFA at  $4^{\circ}\text{C}$  for three hours followed by cryoprotection in a PBS-buffered  
172 sucrose (30%) solution until brains were saturated ( $\sim 36$  h).  $50\ \mu\text{m}$  coronal brain sections  
173 were cut on a freezing microtome (SM 2010R, Leica). Brain sections were first washed in  
174 PBS (3 x 5 min) at room temperature (RT) and then were blocked in 3% normal goat  
175 serum (NGS) in PBST (0.3% Triton X-100) for 30 min at RT, followed by incubation  
176 with primary antibodies overnight at  $4^{\circ}\text{C}$ . Sections were then washed with PBS (4 x 15  
177 min) and incubated with fluorescent secondary antibodies at RT for 2 hours. After

178 washing with PBS (4 x 15 min), sections were mounted onto glass slides with  
179 Fluoromount-G (Beckman Coulter). Images were taken using a LSM 780 laser-scanning  
180 confocal microscope (Carl Zeiss).

181

## 182 **Electrophysiology**

183 For electrophysiological experiments, mice were anesthetized with isoflurane,  
184 decapitated and their brains quickly removed and chilled in ice-cold dissection buffer  
185 (110.0 mM choline chloride, 25.0 mM NaHCO<sub>3</sub>, 1.25 mM NaH<sub>2</sub>PO<sub>4</sub>, 2.5 mM KCl, 0.5  
186 mM CaCl<sub>2</sub>, 7.0 mM MgCl<sub>2</sub>, 25.0 mM glucose, 11.6 mM ascorbic acid and 3.1mM  
187 pyruvic acid, gassed with 95% O<sub>2</sub> and 5% CO<sub>2</sub>). Coronal slices (300 μm) containing the  
188 amygdala complex were cut in dissection buffer using a HM650 Vibrating-blade  
189 Microtome (Thermo Fisher Scientific). Slices were immediately transferred to a storage  
190 chamber containing artificial cerebrospinal fluid (ACSF) (118 mM NaCl, 2.5 mM KCl,  
191 26.2 mM NaHCO<sub>3</sub>, 1 mM NaH<sub>2</sub>PO<sub>4</sub>, 20 mM glucose, 2 mM MgCl<sub>2</sub> and 2 mM CaCl<sub>2</sub>, at  
192 34 °C, pH 7.4, gassed with 95% O<sub>2</sub> and 5% CO<sub>2</sub>). After 40 min recovery time, slices  
193 were transferred to RT (20–24°C) and perfused with ACSF constantly.

194

195 Simultaneous whole-cell patch-clamp recordings from pairs of SOM<sup>+</sup> and SOM<sup>-</sup> CeL  
196 neurons were obtained with Multiclamp 700B amplifiers (Molecular Devices).  
197 Recordings were under visual guidance using an Olympus BX51 microscope equipped  
198 with both transmitted light illumination and epifluorescence illumination, and SOM<sup>+</sup> cells  
199 were identified based on their fluorescence (tdTomato). To evoke IC-driven synaptic  
200 transmission onto CeL neurons, the AAV-ChR2-YFP was injected into the IC of *Som-*



201 *Cre;Ail4* mice and allowed to express for 3 weeks. Acute brain slices were prepared, and  
202 a blue light was used to stimulate ChR2-expressing axons in the CeL. The light source  
203 was a single-wavelength LED system ( $\lambda = 470$  nm; CoolLED.com) connected to the  
204 epifluorescence port of the Olympus BX51 microscope. 1 ms light pulses were triggered  
205 by a TTL signal from the Clampex software to drive synaptic responses. Light pulses  
206 were delivered every 10 seconds and synaptic responses were low-pass filtered at 1 KHz  
207 and recorded at holding potentials of  $-70$  mV (for AMPA-receptor-mediated responses)  
208 and  $+40$  mV (for NMDA-receptor-mediated responses). NMDA-receptor-mediated  
209 responses were quantified as the mean current amplitude from 50-60 ms after stimulation.  
210 Evoked EPSCs were recorded in ACSF with  $100$   $\mu$ M picrotoxin to block inhibitory  
211 synaptic transmission. The internal solution for voltage-clamp experiments contained  $115$   
212 mM cesium methanesulphonate,  $20$  mM CsCl,  $10$  mM HEPES,  $2.5$  mM MgCl<sub>2</sub>,  $4$  mM  
213 Na<sub>2</sub>-ATP,  $0.4$  mM Na<sub>3</sub>GTP,  $10$  mM Na-phosphocreatine and  $0.6$  mM EGTA (pH 7.2).  
214 To assess presynaptic function, a paired-pulse stimulation protocol ( $50$  ms inter-stimulus  
215 interval) was used to evoke double-EPSCs, and paired-pulse ratio (PPR) was quantified  
216 as the ratio of the peak amplitude of the second EPSC to that of the first EPSC.

217

### 218 **Monosynaptic tracing with pseudotyped rabies virus**

219 Retrograde tracing of monosynaptic inputs onto genetically-defined cell populations of  
220 CeL was performed and described in our previous study (Penzo et al., 2015), and the data  
221 presented here were generated from the same study but were not published previously.  
222 Briefly, the *Som-cre;Rosa26-stop<sup>fllox</sup>-tTA* mice and the *Prkcd-cre;Rosa26-stop<sup>fllox</sup>-tTA*  
223 mice, which express tTA in SOM<sup>+</sup> cells and PKC- $\delta$ <sup>+</sup> cells, respectively, were injected

224 into the CeL with the AAV-TRE-hGFP-TVA-G (0.2–0.3  $\mu$ l) that expresses the following  
225 components in a tTA-dependent manner: a fluorescent reporter histone GFP (hGFP);  
226 TVA (which is a receptor for the avian virus envelope protein EnvA); and the rabies  
227 envelope glycoprotein (G). Two weeks later the mice were injected in the same location  
228 with the rabies-EnvA-SAD- $\Delta$ G-mCherry (1.2  $\mu$ l), a rabies virus that is pseudotyped with  
229 EnvA, lacks the envelope glycoprotein, and expresses mCherry. This method ensures that  
230 the rabies virus exclusively infects cells expressing TVA. Furthermore, complementation  
231 of the modified rabies virus with envelope glycoprotein in the TVA-expressing cells  
232 allows the generation of infectious particles, which then can trans-synaptically infect  
233 presynaptic neurons.

234

### 235 **Stereotaxic surgery**

236 Standard surgical procedures were followed for stereotaxic injection (Li et al., 2013;  
237 Penzo et al., 2015). Briefly, mice were anesthetized with ketamine (100 mg per kg of  
238 body weight) supplemented with dexmedetomidine hydrochloride (0.4 mg per kg) and  
239 positioned in a stereotaxic injection frame (myNeuroLab.com). A digital mouse brain  
240 atlas was linked to the injection frame to guide the identification and targeting (Angle  
241 Two Stereotaxic System, myNeuroLab.com).

242

243 Viruses ( $\sim$ 0.4  $\mu$ l) were delivered with a glass micropipette (tip diameter,  $\sim$ 5  $\mu$ m) through  
244 a skull window (1–2 mm<sup>2</sup>) by pressure applications (5–20 psi, 5–20 ms at 0.5 Hz)  
245 controlled by a Picospritzer III (General Valve) and a pulse generator (Agilent). The  
246 injection was performed at the following stereotaxic coordinates for CeL: 1.18 mm

247 posterior, 2.9 mm lateral, and 4.6 mm ventral from bregma; and for IC: 0.10 mm  
248 posterior, 3.90 mm lateral, and 4.20 mm ventral from bregma. For optogenetic  
249 experiments, immediately after viral injection, an optical fiber (core diameter, 105  $\mu\text{m}$ ;  
250 Thorlabs, Catalog number FG105UCA) was implanted 300  $\mu\text{m}$  above the center of viral  
251 injection. The optical fiber together with the ferrule (Thorlabs) was secured to the skull  
252 with C&B-Metabond Quick adhesive luting cement (Parkell Prod), followed by dental  
253 cement (Lang Dental Manufacturing).

254

255 Following the above procedures, a small piece of metal bar was mounted on the skull,  
256 which was used to hold the mouse in the head fixation frame during behavior  
257 experiments.

258

## 259 **Behavioral tasks**

### 260 *Licking Behavior*

261 Water deprivation started 23 hours before training. Mice were trained in the head fixation  
262 frame for 10 minutes daily. A metal spout was placed in front of the animal's mouth for  
263 water delivery. The spout also served as part of a custom "lickometer" circuit, which  
264 registered a lick event each time a mouse completed the circuit by licking the spout while  
265 standing on a metal floor. The lick events were recorded by a computer through custom  
266 software written in LabView (National Instruments). Each lick triggered a single opening  
267 of a water valve calibrated to deliver 0.3  $\mu\text{l}$  water.

268

269 It took mice 4–7 days to achieve stable licking, the criterion for which was 10-minute  
270 continuous licking with no interval between licking longer than 10 seconds. We used a  
271 lick suppression index to quantify animals' degree of photostimulation-evoked  
272 suppression of licking behavior: Lick suppression index =  $(L_{\text{PRE}} - L_{\text{CS}}) / (L_{\text{PRE}} + L_{\text{CS}})$ ,  
273 where  $L_{\text{PRE}}$  is the number of licks in the 5 s period before CS onset, and  $L_{\text{CS}}$  is the  
274 number of licks in the 5 s CS period (Yu et al., 2016).

275

### 276 ***Go/no-go task***

277 Water deprivation started 23 hours before training, and mice were habituated to the head  
278 fixation frame for 20 minutes on the first day of training with access to water through the  
279 metal spout. On following days, animals underwent 2 training sessions each day, one in  
280 the morning and the other in the afternoon. The 2 sessions were at least 4 hours apart,  
281 with each consisting of 100 trials. For the subsequent 3-6 sessions, mice were exposed  
282 only to the “go” cue (a 1-s, 5-kHz pure tone) followed by the delivery of 4.5  $\mu\text{l}$  of water.  
283 After mice successfully retrieved water on at least 80% of the trials, they moved to the  
284 next training phase, in which they were required to lick the spout at least 1 time during  
285 the go cue in order for the water to be released. This phase took an additional 3-6 sessions  
286 until the animals reached the criteria of 80% correct responses. Following this phase,  
287 animals received 1 training session consisting of the go cue paired with the delivery of  
288 sucrose solution (100 mM) instead of water.

289

290 The next phase consisted of 10 sessions of go/no-go training. During this phase, 50  
291 presentations of the go cue were delivered randomly intermixed with 50 presentations of

292 the “no-go” cue (a 1-s white noise), with the constraint that either cue could not appear  
293 more than 5 times in a row, and that the first trial was always a go cue. Licking the spout  
294 during the no-go cue resulted in the delivery of quinine solution (4.5  $\mu$ l, 5 mM). The mice  
295 were required to lick at least once the spout during the 1 s window of cue presentation in  
296 order to receive the US. During all phases of the experiment, brief suction (500 ms in  
297 duration) near the spout was applied 3.5 s after tone onset to remove any residual solution  
298 from the previous trial.

299

300 For analysis, trials were sorted into go trials and no-go trials. A correct response during a  
301 go trial (“hit”) occurred when the mouse successfully licked the spout during the go cue  
302 and subsequently received sucrose. A correct response during a no-go trial (“correct  
303 reject”) occurred when the mouse successfully omitted the lick response during the no-go  
304 cue and thus avoided quinine. The overall performance over the entire session was  
305 calculated as the total correct responses divided by the total trials: overall performance =  
306 (hits + correct rejects) / (total trials).

307

308 For the optogenetics experiments we used a modified version of this go/no-go task, in  
309 which licking during the go cue led to water delivery (4.5  $\mu$ l), whereas licking during the  
310 no-go cue resulted in water delivery (4.5  $\mu$ l) accompanied by laser stimulation. The laser  
311 was delivered coincidentally with water delivery (50 ms after CS offset) at 20- or 30-Hz  
312 for 2.5 seconds (the duration that the water would be available if the animal licked during  
313 the no-go cue presentation). Suction was applied to remove any unconsumed water.  
314 Animals received 8 training sessions in the final phase of this task.

315

316 ***Real time place aversion (RTPA)***

317 As previously described (Stephenson-Jones et al., 2016), one side of a custom chamber  
318 (23 × 33 × 25 cm; made from plexiglass) was assigned as the stimulation zone,  
319 counterbalanced among mice. Mice were placed individually in the middle of the  
320 chamber at the onset of the experiment, the duration of which was 30 min. Laser  
321 stimulation (5-ms pulses delivered at 20 or 30 Hz) was triggered when mice entered the  
322 stimulation zone, and lasted until mice exited the stimulation zone. Mice were videotaped  
323 with a CCD camera interfaced with the Ethovision software (Noldus Information  
324 Technologies), which was used to control the laser stimulation and extract the behavioral  
325 parameters (position, time, distance, and velocity).

326

327 ***In vivo optogenetics***

328 For bilateral optogenetic stimulation in the CeL, a branched patch-cord (Doric Lenses,  
329 Catalog number BFP(2)\_105/125/900-0.22\_1m\_FC-2xZF1.25) for light delivery was  
330 connected at one end to a laser source ( $\lambda = 473$  nm, OEM Laser Systems) and at the other  
331 end, which was composed of two terminals, to two CeL-implanted optical fibers through  
332 sleeves (Thorlabs). For photostimulation-induced lick suppression, the stimuli were 5-ms  
333 30-Hz light pulses (or across a range of frequencies) delivered for 5 s. For  
334 photostimulation during RTPA, 5-ms 20- or 30-Hz light pulses were delivered. Laser  
335 intensity was 10 mW measured at the end of optical fiber.

336

337 **Statistics and data presentation**

338 All data are presented as mean  $\pm$  s.e.m. All statistics are indicated where used. Data were  
339 analyzed with GraphPad Prism. Behavioral tests were performed by an investigator with  
340 knowledge of the identity of the experimental groups. All behavior experiments were  
341 controlled by computer systems, and data were collected and analyzed in an automated  
342 and unbiased way. Virus-injected animals in which the injection or optical fiber  
343 implantation was misplaced were excluded.

344

345 **Results**

346 To investigate the function of the IC-CeL circuit, we began by characterizing how IC  
347 neurons innervate the major CeL cell types. We first used a modified rabies virus system  
348 to trace the monosynaptic inputs onto CeL neurons (Callaway and Luo, 2015; Penzo et  
349 al., 2015). This approach revealed a monosynaptic projection from the IC to the CeL  
350 (Fig. 1A, B). In particular, IC neurons innervate both of the two major populations of the  
351 CeL, the SOM<sup>+</sup> neurons and PKC- $\delta$ <sup>+</sup> neurons (Fig. 1A, B). Notably, the IC was the only  
352 cortical region identified by this approach to send monosynaptic projections to the CeL.  
353 The CeL-projecting IC neurons were preferentially localized in the posterior part of the  
354 IC, which overlaps at least partially with the GC (Fig. 1B).

355

356 As the IC also sends projections to the BLA (Allen et al., 1991), we next determined  
357 whether the same IC neurons project to both the CeL and the BLA. To this end we  
358 injected the CeL and BLA with the retrograde tracer AlexaFluor-488- or 555-conjugated  
359 cholera toxin (CTB-488 or CTB-555), respectively (Fig. 1C). We found that CTB

360 reliably labeled CeL-projecting IC neurons (Fig. 1D), with a distribution pattern similar  
361 to that of CeL-projecting IC neurons labeled by the rabies virus (Fig. 1B). CTB also  
362 labeled a prominent population of BLA-projecting IC neurons, the vast majority of which  
363 has a distribution pattern distinct from that of CeL-projecting IC neurons (Fig. 1D). This  
364 result demonstrates that CeL-projecting neurons and BLA-projecting neurons in the IC  
365 are largely non-overlapping populations.

366

367 To selectively target the CeL-projecting IC neurons and visualize their axonal  
368 projections, we injected the CeL with a retrograde canine adenovirus expressing Cre  
369 recombinase (CAV2-Cre) (Bru et al., 2010), followed by injecting the IC with an adeno-  
370 associated virus harboring a double-floxed inverted open reading frame (AAV-DIO) that  
371 expresses, in a Cre-dependent manner, a presynaptic protein synaptophysin tagged with a  
372 fluorescent protein mCherry (AAV-DIO-synaptophysin-mCherry) (Fig. 1E). This  
373 strategy led to the labeling of IC neurons that sent dense axonal fibers to the CeL (Fig.  
374 1F). Sparse labeling of axon fibers in the BLA can also be detected (Fig. 1F), which  
375 likely was caused by spillover of the CAV2-Cre to the BLA and thus the labeling of  
376 BLA-projecting IC neurons. Though the ipsilateral CeL had the densest projections, we  
377 also observed mCherry<sup>+</sup> axon terminals in the contralateral CeL, consistent with results  
378 from retrograde tracing with CTB (data not shown). Altogether, the anatomical tracing  
379 results demonstrate that the IC sends robust projections to the CeL, and that the IC-CeL  
380 and IC-BLA are distinct circuits.

381



382 To assess the synaptic connectivity between the IC and CeL, we used the *Som-cre;Ai14*  
383 mice, in which SOM<sup>+</sup> cells can be identified by their red fluorescence, and injected the IC  
384 of these mice with an AAV expressing the light-gated cation channel channelrodhopsin-2  
385 (AAV-ChR2-YFP) that allows photostimulation of axonal projections (Zhang et al.,  
386 2006) (Fig. 2A). Approximately 3 weeks after the AAV injection, we prepared from these  
387 mice acute brain slices containing the CeL, in which we recorded synaptic transmission  
388 onto simultaneously patched pairs of adjacent SOM<sup>+</sup> (red-fluorescent) and SOM<sup>-</sup> (non-  
389 fluorescent) CeL neurons in response to optogenetic stimulation of the IC inputs. Brief  
390 light pulses evoked fast excitatory synaptic transmission in nearly all the recorded CeL  
391 neurons (Fig. 2B). Notably, the AMPA receptor-mediated component of synaptic  
392 transmission onto SOM<sup>+</sup> neurons was significantly greater than that onto SOM<sup>-</sup> neurons  
393 (Fig. 2B-C). The NMDA receptor-mediated synaptic transmission onto these two  
394 neuronal populations was not different. In a subset of these pairs, we also examined  
395 paired-pulse ratio (PPR; see Methods) and found no significant difference between the  
396 two cell types (Fig. 2C). These results indicate that IC inputs can activate both SOM<sup>+</sup>  
397 neurons and SOM<sup>-</sup> neurons in the CeL, with the latter being mainly PKC- $\delta^+$  neurons (Li  
398 et al., 2013).

399

400 We reasoned that the IC-CeL circuit could have a role in behavioral inhibition, because  
401 SOM<sup>+</sup> CeL neurons are essential for the generation of passive defensive responses,  
402 including freezing behavior and action suppression (Fadok et al., 2017; Li et al., 2013;  
403 Penzo et al., 2015; Yu et al., 2016), while PKC- $\delta^+$  CeL neurons convey aversive US  
404 information and are sufficient to instruct aversive learning (Yu et al., 2017). To test this

405 hypothesis, we set out to inhibit the CeL-projecting IC neurons in mice and subsequently  
406 trained these mice in a go/no-go task that engages the IC. We first injected the CeL with  
407 the CAV2-Cre (Fig. 3A), and then injected the IC in the same mice with an AAV  
408 expressing the tetanus toxin light chain (TeLC), which blocks neurotransmitter release  
409 (Murray et al., 2011), or GFP (as a control) in a Cre-dependent manner (AAV-DIO-  
410 TeLC-GFP or AAV-DIO-GFP, respectively) (Fig. 3A). As described above (Fig. 1E, F),  
411 this strategy led to selective targeting of the IC-CeL circuit (Fig. 3B, C).

412

413 Four to five weeks following viral injections, we began training these mice in the go/no-  
414 go task (see Methods), in which an auditory stimulus (go cue) predicts the delivery of a  
415 palatable liquid (sucrose), while a different auditory stimulus (no-go cue) predicts the  
416 delivery of an unpleasant liquid (quinine) (Fig. 3D). Mice need to learn to produce an  
417 instrumental response (lick) during the go cue to receive sucrose, and inhibit that  
418 response during the no-go cue to avoid quinine (Fig. 4A). Learning in this task has  
419 previously been shown to be paralleled by the development of cue-specific responses in  
420 IC neurons (Gardner and Fontanini, 2014).

421

422 We found that bilateral inhibition of synaptic transmission from CeL-projecting IC  
423 neurons with TeLC markedly affected animals' behavior in the no-go trials, but left that  
424 in the go trials of this task largely unaffected (Fig. 4A, B). Specifically, in the go trials,  
425 mice in both the GFP group and the TeLC group showed stimulus-evoked licking (Fig.  
426 4A), leading to similar performance (Fig. 4B); although closer inspection of these  
427 animals' behavioral patterns revealed that the TeLC mice did not allocate their licking to

428 the CS and US period as much as the GFP control mice, especially on the final training  
429 session (Fig. 4A,B). By contrast, in the no-go trials, while the GFP mice gradually  
430 learned to withhold licking in response to the no-go cue, and thus successfully avoid  
431 quinine in most of the trials towards the end of the training sessions (Fig. 4A, B), the  
432 TeLC mice showed no sign of learning and thus were markedly impaired in performance  
433 even at the end of the training sessions (Fig. 4A, B). The overall performance of the GFP  
434 mice also showed a learning effect, evidenced by a gradual increase in performance over  
435 the first 8 training sessions followed by asymptotic performance (Fig. 4B). On the other  
436 hand, the animals expressing TeLC showed no such improvement with continued training  
437 (Fig. 4B).

438

439 The impairment in behavioral inhibition observed during the no-go trials (or decrease in  
440 the “correct reject”) in the TeLC mice could be caused by a general increase in  
441 responding. If so, then the performance of these mice in the go trials (measured as the  
442 percentage of trials in which the mice made a response; or the “hit” rate) would also  
443 increase. However we observed no such increase; in fact, the TeLC group showed a mild  
444 decrease in hit rate, in particular in late sessions (Fig. 4B). The TeLC mice also showed a  
445 reduced lick rate in response to the go cue, and had lick rate similar to that of the GFP  
446 mice following the delivery of sucrose (Fig. 4A, C, D), further arguing against a general  
447 increase in responding in these mice. In contrast, these mice showed an increased lick  
448 rate specifically to the no-go cue and during the inter-trial interval (ITI) (Fig. 4A, C, E),  
449 consistent with the notion that they were impaired in action suppression. We noticed that  
450 the TeLC mice had a tendency to show increased lick rate following quinine delivery

451 compared with the GFP mice (Fig. 4D), suggesting that inhibiting the IC-CeL pathway  
452 may partially impair the processing of aversive taste information during this task.  
453 Alternatively, or additionally, the observations that the TeLC mice showed impaired  
454 performance (although mild) and reduced lick rate during the go cue (Fig. 4B,C), as well  
455 as impaired performance and increased lick rate during the no-go cue and quinine  
456 delivery (Fig. 4B-D) could be explained by an impairment in these mice in anticipation of  
457 salient outcomes, a function that has been attributed to the CeA (Balleine and Killcross,  
458 2006; Haney et al., 2010; Roesch et al., 2012).

459

460 We also tested a subset of these animals on their sensitivity to increasing concentrations  
461 of quinine during a free-licking session (10 minute). Similar to the GFP control group,  
462 the TeLC group showed decreased average licking rate during this period (reflecting a  
463 reduction in the total volume consumed) with increasing concentrations of quinine (Fig.  
464 4F). This result is consistent with previous findings that lesions of the GC in rats do not  
465 affect the amount of either quinine or sucrose solutions consumed at varying  
466 concentrations (Hashimoto and Spector, 2014), and indicates that inhibition of CeL-  
467 projecting IC neurons does not abolish animals' basic ability to process quinine's sensory  
468 and aversive properties, at least when there is little cognitive demand. Together, these  
469 results indicate that the IC-CeL pathway is required for establishing the learned,  
470 anticipatory behavioral inhibition to avoid an aversive tastant.

471

472 Our results suggest that the CeL-projecting IC neurons preferentially regulate the no-go  
473 response, consistent with the critical role of the CeL in processing aversive information

474 and in the learning and expression of avoidance behaviors. We therefore tested whether  
475 activation of the IC-CeL pathway is sufficient to drive aversive responses as well as  
476 instruct learning of an avoidance behavior. For this purpose we delivered the ChR2 or  
477 GFP (as a control) specifically into CeL-projecting IC neurons bilaterally, using the  
478 retrograde and intersectional strategy based on the CAV2-Cre as described above (Fig.  
479 5A), and subsequently bilaterally implanted optical fibers over the CeL (Fig. 5B, C).

480

481 Four to five weeks following surgery, these mice were water deprived and trained to  
482 achieve stable licking to a water spout, during which we delivered pulses of blue light  
483 into the CeL. Photostimulation in the CeL in which the axon terminals originating from  
484 the IC expressed ChR2 elicited robust suppression of licking, an effect that was  
485 dependent on the frequency of stimulation (Fig. 5D, E). Furthermore, such optogenetic  
486 activation of the IC-CeL pathway induced place aversion in a real time place aversion  
487 (RTPA) task (Fig. 5F). By contrast, photostimulation in the CeL in which IC axons  
488 expressed GFP induced neither lick suppression nor place aversion (Fig. 5D-F). These  
489 results suggest that activation of the IC-CeL circuit is aversive, and is sufficient to induce  
490 action suppression and avoidance responses.

491

492 To test whether activation of the IC-CeL circuit can be substituted for an aversive tastant  
493 to instruct avoidance learning, similar to learning of the no-go response in the go/no-go  
494 task, we trained the same mice as those used in Fig. 5 in a modified go/no-go task, in  
495 which licking during one cue led to water delivery alone (the “laser-off” trials), whereas  
496 licking during another cue resulted in water delivery coinciding with bilateral

497 photostimulation in the CeL (the “laser-on” trials) (Fig. 6A; also see Methods). We found  
498 that the mice in which the IC-CeL pathway expressed Chr2 – and thus could be activated  
499 by the photostimulation – showed reduced responding to the cue in the laser-on trials  
500 compared with in the laser-off trials (Fig. 6B, C). By contrast, the mice in which the IC-  
501 CeL pathway expressed GFP showed similar cue-evoked responding in the laser-on or  
502 laser-off trials (Fig. 6B, C). We also verified that the photostimulation did not cause  
503 obvious motor effects in either the Chr2 mice or the GFP mice in an open field setting  
504 (Fig. 6D).

505

506 Of note, although optogenetic activation of the IC-CeL pathway was less effective than  
507 quinine reinforcement, we observed a pattern of responding in these mice qualitatively  
508 similar to that of the control animals trained on the standard sucrose/quinine go/no-go  
509 task (Fig. 4B), in which the mice showed low levels of responding to the no-go cue and  
510 high levels of responding to the go cue. Together, these results indicate that activation of  
511 the IC-CeL pathway is sufficient to instruct the learning of anticipatory action  
512 suppression. This mechanism is likely engaged when learning to avoid an aversive  
513 outcome, such as an unpleasant tastant.

514

## 515 **Discussion**

516 In this study we examined the role of the IC-CeL circuit in the establishment of  
517 behavioral inhibition for avoiding an unpleasant tastant. Using retrograde anatomic  
518 tracing approaches, including the modified rabies virus-assisted tracing, together with  
519 Chr2-based circuit mapping, we found that the GC region of the IC sends direct

520 excitatory projections to the CeL, which make monosynaptic connections with both the  
521  $SOM^+$  and  $SOM^-$  CeL neurons, with the latter being mainly  $PKC-\delta^+$  neurons (Li et al.,  
522 2013; Penzo et al., 2014). Specific inhibition of the CeL-projecting IC neurons with  
523 TeLC prevented mice from acquiring the no-go response, and only mildly affected the go  
524 response in a tastant (sucrose/quinine)-reinforced go/no-go task. Furthermore, selective  
525 activation of the IC-CeL pathway with optogenetics drove unconditioned lick suppression  
526 in thirsty animals, induced avoidance behavior, and was sufficient to instruct conditioned  
527 action suppression in response to the cue that predicts the optogenetic activation. These  
528 results demonstrate that activity in the IC-CeL circuit is necessary for establishing  
529 anticipatory avoidance responses to an unpleasant tastant, and is also sufficient to drive  
530 learning of such anticipatory avoidance responses.

531

532 The IC has been shown to contain regions with selective responses to distinct tastants  
533 (Chen et al., 2011). As measured in anesthetized animals, these “hotspots” occupy non-  
534 overlapping regions within the GC. The region with preferential responses to bitter tastes  
535 resides in the posterior part of the GC, which corresponds approximately to the area of IC  
536 we identified that sends the strongest projections to the CeL (also see (Allen et al.,  
537 1991)). These findings suggest that the IC may preferentially convey information about  
538 bitter/aversive tastants to the CeL, which in turn drive behavioral inhibition. Interestingly,  
539 although the IC has been shown to be required for identifying and discriminating between  
540 tastants (Katz et al., 2001; Peng et al., 2015; Sammons et al., 2016), we did not observe  
541 an effect on quinine sensitivity when we selectively silenced the IC-CeL pathway with  
542 TeLC (Fig. 4F), suggesting that the ability for bitter tastant identification and that for

543 processing the basic reinforcing properties of bitter tastants are preserved in these mice,  
544 at least when cognitive demand is low.

545

546 The CeA, including the CeL, receives aversive information of different modalities  
547 directly from the brainstem parabrachial nucleus (PBN) (Carter et al., 2013; Han et al.,  
548 2015; Norgren et al., 1989; Sato et al., 2015). Previous studies have shown that the CeA  
549 responds to noxious stimuli, such as footshocks that induce somatic pain (Han et al.,  
550 2015; Radulovic et al., 1998), colorectal distension that induces visceral pain (Myers and  
551 Greenwood-Van Meerveld, 2012), and lithium chloride, which induces malaise and is the  
552 most commonly used US for inducing conditioned taste aversion (Lamprecht and Dudai,  
553 1995). The CeA has also been implicated in taste processing (Sadacca et al., 2012) and  
554 feeding behaviors (Cai et al., 2014). Thus, the CeA is anatomically poised to process  
555 convergent somatosensory, visceral, gustatory and aversive information and may be  
556 recruited by multiple neural circuits for action suppression in a variety of tasks, in which  
557 the goal is to avoid unwanted consequences.

558

559 More recent studies, including those of our own, indicate that the CeA contains  
560 functionally heterogeneous neuronal populations.  $SOM^+$  CeL neurons control passive  
561 defensive responses, such as freezing and action suppression (Fadok et al., 2017; Li et al.,  
562 2013; Penzo et al., 2014; Penzo et al., 2015; Yu et al., 2016), whereas  $PKC-\delta^+$  CeL  
563 neurons are involved in conveying aversive US information and instructing aversive  
564 learning (Yu et al., 2017). The  $PKC-\delta^+$  CeL neurons have also been linked to suppression  
565 of feeding (Cai et al., 2014). As both of these CeL populations receive direct excitatory



566 inputs from the IC (Fig. 1), they may contribute to distinct aspects of the IC-CeL circuit  
567 function described in the current study. An intriguing possibility is that the SOM<sup>+</sup>  
568 population induces action suppression when excited by IC inputs, while the PKC- $\delta$ <sup>+</sup>  
569 population regulates learning and potentially aversion when activated by the same inputs.  
570 Some of the functions mediated by CeL neurons, in particular those by PKC- $\delta$ <sup>+</sup> neurons,  
571 are consistent with the findings that the CeA plays a role in alerting or attentional  
572 processes, and can explain our observations suggesting that the IC-CeL circuit may have  
573 a more general function in behavior, i.e., it influences performance and actions during not  
574 only the no-go trials, but also the go trials of the go/no-go task, although the impact on  
575 the no-go trials is much stronger.

576

## 577 **Figures**

578 **Figure 1. The IC sends monosynaptic projections to the amygdala.** (A) A schematic  
579 of the experimental approach (see Methods). (B) Representative images of the tracing  
580 result for SOM<sup>+</sup> (left) and PKC- $\delta$ <sup>+</sup> (right) CeL neurons. Top, retrogradely labeled neurons  
581 in the IC. Bottom, starter neurons in the CeL are identified by their co-expression of  
582 mCherry and histone GFP (cells in yellow). Data in A & B were replicated in 3 mice for  
583 each group, and were from the same injections reported in (Penzo et al., 2015). (C) Top:  
584 a schematic of the experimental approach. Bottom: a representative image of the injection  
585 sites. (D) The distribution of the BLA-projecting (red) and the CeL-projecting (green)  
586 neurons in the IC. AIC, agranular insular cortex; GIC, granular insular cortex; DIC,  
587 disgranular insular cortex. Data in C & D were replicated in two mice. (E) A schematic  
588 of the experimental approach. (F) Representative images showing the mCherry<sup>+</sup> axons

589 (top), which originated from the CeL-projecting IC neurons (bottom). In the insets are  
590 enlarged images of the boxed areas in the right, which are located in the amygdala (top)  
591 and the IC (bottom).

592

593 **Figure 2: Functional connectivity between IC neurons and CeL neurons.**

594 (A) A schematic of the experimental design. AAV-ChR2-YFP was injected into the IC of  
595 a *SOM;Ai14* mouse (left), and patch clamp recording was performed in acute slices  
596 containing the amygdala (right). (B) Sample traces of EPSCs recorded from a  $SOM^+$  and  
597 a  $SOM^-$  CeL neuron, which were recorded simultaneously. The EPSCs were evoked by  
598 optogenetic stimulation of the IC axons terminating in the CeL, with the AMPA receptor-  
599 mediated EPSCs being stimulated with two pulses (50 ms inter-pulse interval) protocol.

600 (C) Quantification of the EPSC amplitude evoked by the first pulse mediated by AMPA  
601 receptors is shown in the left panel, NMDA receptors is shown in the middle, and the  
602 paired-pulse ratio (PPR) of AMPA receptor-mediated EPSCs is shown on the right. T-  
603 tests revealed that the AMPA receptor-mediated EPSC was larger in  $SOM^+$  than  $SOM^-$   
604 CeL neurons (AMPA,  $t(18) = 3$ ,  $*P = 0.0085$ , NMDA,  $t(18) = 0.7$ ,  $P = 0.47$ ,  $n = 10$  pairs,  
605  $t$  test; PPR,  $t(12) = 1.8$ ,  $P = 0.1$ ,  $n = 7$  pairs,  $t$  test). Data in C are presented as mean  $\pm$   
606 s.e.m.

607

608 **Figure 3. Experimental design to test the role of the IC-CeL circuit in a go/no-go**

609 **task.** (A) A schematic of the experimental design to selectively inhibit the IC-CeL  
610 circuit. (B) Representative images showing the cells in the IC infected with GFP (left  
611 panels) and TeLC-GFP (right panels) virus. In the lower panel are enlarged images of the

612 boxed areas in the images in the upper panel. (C) Axon terminals expressing GFP (left)  
613 or TeLC-GFP (right), which originated from CeL-projecting IC neurons. (D) A schematic  
614 of the go/no-go task.

615

616 **Figure 4. The IC-CeL circuit is required for suppression of behavioral responding.**

617 (A) Population histogram of licking behavior during the first and final sessions of go/no-  
618 go training. Licking behavior is represented separately according to go (top panels) or no-  
619 go (bottom panels) trials for both GFP (blue;  $n = 9$ ) and TeLC (red;  $n = 7$ ) mice. Dashed  
620 line denotes the time window of CS delivery. US was delivered 50 ms after CS offset.  
621 Shaded regions represent s.e.m. (B) Quantification of performance (the percentage of  
622 correct responding trials) on the go/no-go task. For the go trials, the TeLC animals  
623 showed a mild reduction in performance compared to GFP animals (two-way repeated  
624 measures (RM) ANOVA revealed a significant interaction, but no main effects: main  
625 effect of session,  $F(9,126) = 1.4$ ;  $P = 0.2$ ; main effect of virus treatment,  $F(1,14) = 2.4$ ;  $P$   
626  $= 0.1$ ; interaction,  $F(9,126) = 2.8$ ;  $P < 0.01$ ;  $*P < 0.01$ , Post hoc Sidak's multiple  
627 comparisons test). For the no-go trials, the TeLC animals showed a marked reduction in  
628 performance compared to GFP animals (two-way RM ANOVA revealed a main effect of  
629 session ( $F(9,126) = 2.84$ ;  $P = 0.005$ ), a main effect of virus treatment ( $F(1,14) = 17.56$ ;  $P$   
630  $< 0.001$ ), and a significant interaction ( $F(9,126) = 4.8$ ;  $P < 0.001$ );  $*P < 0.05$ , Post hoc  
631 Sidak's multiple comparisons test). For the overall performance, the TeLC animals  
632 showed a reduction in performance compared to GFP animals (two-way RM ANOVA  
633 revealed a main effect of session ( $F(9,126) = 2.41$ ;  $P = 0.01$ ), a main effect of virus  
634 treatment ( $F(1,14) = 24.28$ ;  $P < 0.01$ ), and a significant interaction ( $F(9,126) = 9.8$ ;  $P <$

635 0.01). \* $P < 0.01$ , Post hoc Sidak's multiple comparisons test). (C) TeLC animals showed  
636 a mild reduction in licking in response to the go cue (two-way RM ANOVA revealed a  
637 significant interaction, but no main effects (main effect of session,  $F(9,126) = 1.9$ ;  $P =$   
638  $0.06$ ; main effect of virus treatment,  $F(1,14) = 4.1$ ;  $P = 0.06$ ; interaction,  $F(9,126) = 3.5$ ;  
639  $P < 0.001$ ; \* $P < 0.05$ , Post hoc Sidak's multiple comparisons test). TeLC animals showed  
640 an increase in licking in response to the no-go cue (two-way RM ANOVA revealed a  
641 main effect of session ( $F(9,126) = 3.76$ ;  $P < 0.001$ ), a main effect of virus treatment  
642 ( $F(1,14) = 15.8$ ;  $P = 0.001$ ), and a significant interaction ( $F(9,126) = 4.45$ ;  $P < 0.001$ ; \* $P$   
643  $< 0.05$ , Post hoc Sidak's multiple comparisons test). (D) TeLC inhibition of the IC-CeL  
644 circuit did not affect US-evoked licking rate ( $P > 0.05$ , two-way RM ANOVA). (E)  
645 TeLC inhibition of the IC-CeL circuit increased the inter-trial licking rate (two-way RM  
646 ANOVA revealed a main effect of session ( $F(9,126) = 4.13$ ;  $P < 0.001$ ), a main effect of  
647 virus treatment ( $F(1,14) = 15.73$ ;  $P = 0.001$ ), and a significant interaction ( $F(9,126) =$   
648  $2.08$ ;  $P = 0.037$ ); \* $P < 0.05$ , Post hoc Sidak's multiple comparisons test). (F) Quinine  
649 sensitivity test showing lick rate during a 10-minute free-licking session for various  
650 concentrations of quinine followed by a final session of water. TeLC inhibition of the IC-  
651 CeL circuit did not affect quinine sensitivity (two-way RM ANOVA main effect of  
652 quinine concentration,  $F(7,84) = 16.3$ ,  $P < 0.0001$ ; main effect of virus,  $F(1,12) = 0.78$ ,  $P$   
653  $= 0.4$ ; interaction,  $F(7,84) = 0.24$ ,  $P = 0.97$ ). All data are presented as mean  $\pm$  s.e.m.

654

655 **Figure 5. Optogenetic activation of the IC-CeL circuit is sufficient to induce action**  
656 **suppression and avoidance behavior. (A & B)** Schematics of the experimental design.  
657 (C) Representative images showing the locations of optical fiber implantation and green

658 axon fibers in the CeL, which originated from CeL-projecting IC neurons expressing  
659 ChR2-YFP (left) or GFP (right). **(D)** Raster plots showing licking behavior for a GFP  
660 (left) and a ChR2 (right) animal. Blue bars and shaded areas indicate the time window of  
661 laser stimulation. **(E)** Quantification of the effect of the photostimulation on licking  
662 behavior (suppression index) at different stimulation frequencies ( $F(4,14) = 4.375$ ,  $P =$   
663  $0.017$ ;  $*P = 0.024$ ,  $**P = 0.007$ ; one-way ANOVA followed by Sidak's multiple  
664 comparisons test; 5-20Hz,  $n = 3$  mice; 30Hz,  $n = 6$  mice). **(F)** In a real-time place  
665 avoidance behavioral paradigm, the ChR2 animals avoided the stimulation side (two-way  
666 RM ANOVA main effect of stimulation side,  $F(2,16) = 4.27$ ;  $P = 0.03$ ; main effect of  
667 virus treatment,  $F(1,8) = 1.53$ ;  $P = 0.25$ ); interaction,  $F(2,16) = 6.94$ ;  $P = 0.007$ ;  $**P =$   
668  $0.005$ , Post hoc Sidak's multiple comparisons test; GFP,  $n = 4$  mice, ChR2,  $n = 6$  mice).

669

670 **Figure 6. Optogenetic activation of the IC-CeL circuit is sufficient to instruct**  
671 **avoidance learning.** **(A)** A schematic of the experimental design. **(B)** Animal behavior is  
672 quantified as the percentage of trials that animals chose to lick during CS presentation  
673 (chosen trials) (GFP animals: two-way RM ANOVA showed a main effect of session  
674 ( $F(5,30) = 5.59$ ;  $P < 0.001$ , no main effect of trial type ( $F(1,6) = 2.07$ ;  $P = 0.2$ , and a  
675 significant interaction ( $F(5,30) = 3.05$ ;  $P = 0.024$ ; Post hoc Sidak's multiple comparisons  
676 tests revealed a significant difference in session 1 ( $P = 0.004$ ,  $n = 4$  mice). ChR2 mice:  
677 two-way RM ANOVA showed a main effect of trial type ( $F(1,8) = 5.7$ ;  $P = 0.04$ ), no  
678 main effect of session ( $F(7,56) = 1.35$ ;  $P = 0.25$ ) or interaction ( $F(7,56) = 0.71$ ;  $P = 0.66$ ;  
679  $n = 5$  mice). **(C)** Quantification of the chosen trials in the final training session (two-way  
680 repeated measures ANOVA revealed a main effect of group (GFP vs. ChR2) ( $F(1,7) =$

681 8.19;  $P = 0.024$ ), a main effect of trial type (laser-off vs. laser-on) ( $F(1,7) = 6.59$ ;  $P =$   
682  $0.037$ ), and a significant interaction ( $F(1,7) = 5.778$ ;  $P = 0.047$ );  $*P = 0.015$ , Post hoc  
683 Sidak's multiple comparisons test). **(D)** In an open field, laser stimulation did not affect  
684 movement of mice (GFP or ChR2 mice), measured as average movement velocity over  
685 10 trials ( $P > 0.05$ , two-way RM ANOVA). All data are presented as mean  $\pm$  s.e.m.

686

## 687 **References**

688

689 Accolla, R., and Carleton, A. (2008). Internal body state influences topographical  
690 plasticity of sensory representations in the rat gustatory cortex. *Proc Natl Acad Sci U S A*  
691 *105*, 4010-4015.

692 Ahrens, S., Jaramillo, S., Yu, K., Ghosh, S., Hwang, G.R., Paik, R., Lai, C., He, M.,  
693 Huang, Z.J., and Li, B. (2015). ErbB4 regulation of a thalamic reticular nucleus circuit  
694 for sensory selection. *Nat Neurosci* *18*, 104-111.

695 Allen, G.V., Saper, C.B., Hurley, K.M., and Cechetto, D.F. (1991). Organization of  
696 visceral and limbic connections in the insular cortex of the rat. *J Comp Neurol* *311*, 1-16.

697 Balleine, B.W. (2005). Neural bases of food-seeking: affect, arousal and reward in  
698 corticostriatolimbic circuits. *Physiol Behav* *86*, 717-730.

699 Balleine, B.W. (2011). Sensation, Incentive Learning, and the Motivational Control of  
700 Goal-Directed Action. In *Neurobiology of Sensation and Reward*, J.A. Gottfried, ed.  
701 (Boca Raton (FL)).

702 Balleine, B.W., and Killcross, S. (2006). Parallel incentive processing: an integrated view  
703 of amygdala function. *Trends in Neurosciences* *29*, 272-279.

704 Bermudez-Rattoni, F. (2004). Molecular mechanisms of taste-recognition memory. *Nat*  
705 *Rev Neurosci* *5*, 209-217.

706 Bru, T., Salinas, S., and Kremer, E.J. (2010). An update on canine adenovirus type 2 and  
707 its vectors. *Viruses* *2*, 2134-2153.

708 Cai, H., Haubensak, W., Anthony, T.E., and Anderson, D.J. (2014). Central amygdala  
709 PKC-delta(+) neurons mediate the influence of multiple anorexigenic signals. *Nat*  
710 *Neurosci* *17*, 1240-1248.

711 Callaway, E.M., and Luo, L. (2015). Monosynaptic Circuit Tracing with Glycoprotein-  
712 Deleted Rabies Viruses. *J Neurosci* *35*, 8979-8985.

- 713 Carter, M.E., Soden, M.E., Zweifel, L.S., and Palmiter, R.D. (2013). Genetic  
714 identification of a neural circuit that suppresses appetite. *Nature* 503, 111-114.
- 715 Chen, X., Gabitto, M., Peng, Y., Ryba, N.J., and Zuker, C.S. (2011). A gustotopic map of  
716 taste qualities in the mammalian brain. *Science* 333, 1262-1266.
- 717 Ciocchi, S., Herry, C., Grenier, F., Wolff, S.B., Letzkus, J.J., Vlachos, I., Ehrlich, I.,  
718 Sprengel, R., Deisseroth, K., Stadler, M.B., *et al.* (2010). Encoding of conditioned fear in  
719 central amygdala inhibitory circuits. *Nature* 468, 277-282.
- 720 Fadok, J.P., Krabbe, S., Markovic, M., Courtin, J., Xu, C., Massi, L., Botta, P., Bylund,  
721 K., Muller, C., Kovacevic, A., *et al.* (2017). A competitive inhibitory circuit for selection  
722 of active and passive fear responses. *Nature* 542, 96-100.
- 723 Gallagher, M., Graham, P.W., and Holland, P.C. (1990). The amygdala central nucleus  
724 and appetitive Pavlovian conditioning: lesions impair one class of conditioned behavior. *J*  
725 *Neurosci* 10, 1906-1911.
- 726 Gardner, M.P., and Fontanini, A. (2014). Encoding and tracking of outcome-specific  
727 expectancy in the gustatory cortex of alert rats. *J Neurosci* 34, 13000-13017.
- 728 Goosens, K.A., and Maren, S. (2003). Pretraining NMDA receptor blockade in the  
729 basolateral complex, but not the central nucleus, of the amygdala prevents savings of  
730 conditional fear. *Behav Neurosci* 117, 738-750.
- 731 Han, S., Soleiman, M.T., Soden, M.E., Zweifel, L.S., and Palmiter, R.D. (2015).  
732 Elucidating an Affective Pain Circuit that Creates a Threat Memory. *Cell* 162, 363-374.
- 733 Haney, R.Z., Calu, D.J., Takahashi, Y.K., Hughes, B.W., and Schoenbaum, G. (2010).  
734 Inactivation of the central but not the basolateral nucleus of the amygdala disrupts  
735 learning in response to overexpectation of reward. *J Neurosci* 30, 2911-2917.
- 736 Hashimoto, K., and Spector, A.C. (2014). Extensive lesions in the gustatory cortex in the  
737 rat do not disrupt the retention of a presurgically conditioned taste aversion and do not  
738 impair unconditioned concentration-dependent licking of sucrose and quinine. *Chem*  
739 *Senses* 39, 57-71.
- 740 Haubensak, W., Kunwar, P.S., Cai, H., Ciocchi, S., Wall, N.R., Ponnusamy, R., Biag, J.,  
741 Dong, H.-W., Deisseroth, K., Callaway, E.M., *et al.* (2010). Genetic dissection of an  
742 amygdala microcircuit that gates conditioned fear. *Nature* 468, 270-276.
- 743 Katz, D.B., Simon, S.A., and Nicolelis, M.A. (2001). Dynamic and multimodal responses  
744 of gustatory cortical neurons in awake rats. *J Neurosci* 21, 4478-4489.
- 745 Kelley, A.E. (2004). Ventral striatal control of appetitive motivation: role in ingestive  
746 behavior and reward-related learning. *Neurosci Biobehav Rev* 27, 765-776.

- 747 Kentridge, R.W., Shaw, C., and Aggleton, J.P. (1991). Amygdaloid lesions and stimulus-  
748 reward associations in the rat. *Behav Brain Res* 42, 57-66.
- 749 Kim, J., Zhang, X., Muralidhar, S., LeBlanc, S.A., and Tonegawa, S. (2017). Basolateral  
750 to Central Amygdala Neural Circuits for Appetitive Behaviors. *Neuron* 93, 1464-1479  
751 e1465.
- 752 Kusumoto-Yoshida, I., Liu, H., Chen, B.T., Fontanini, A., and Bonci, A. (2015). Central  
753 role for the insular cortex in mediating conditioned responses to anticipatory cues. *Proc*  
754 *Natl Acad Sci U S A* 112, 1190-1195.
- 755 Lamprecht, R., and Dudai, Y. (1995). Differential modulation of brain immediate early  
756 genes by intraperitoneal LiCl. *Neuroreport* 7, 289-293.
- 757 Li, H., Penzo, M.A., Taniguchi, H., Kopec, C.D., Huang, Z.J., and Li, B. (2013).  
758 Experience-dependent modification of a central amygdala fear circuit. *Nature*  
759 *Neuroscience* 16, 332-339.
- 760 Li, L., Tasic, B., Micheva, K.D., Ivanov, V.M., Spletter, M.L., Smith, S.J., and Luo, L.  
761 (2010). Visualizing the distribution of synapses from individual neurons in the mouse  
762 brain. *PLoS One* 5, e11503.
- 763 Madisen, L., Zwingman, T.A., Sunkin, S.M., Oh, S.W., Zariwala, H.A., Gu, H., Ng, L.L.,  
764 Palmiter, R.D., Hawrylycz, M.J., Jones, A.R., *et al.* (2010). A robust and high-throughput  
765 Cre reporting and characterization system for the whole mouse brain. *Nature*  
766 *Neuroscience* 13, 133-140.
- 767 Murray, A.J., Sauer, J.F., Riedel, G., McClure, C., Ansel, L., Cheyne, L., Bartos, M.,  
768 Wisden, W., and Wulff, P. (2011). Parvalbumin-positive CA1 interneurons are required  
769 for spatial working but not for reference memory. *Nat Neurosci* 14, 297-299.
- 770 Myers, B., and Greenwood-Van Meerveld, B. (2012). Differential involvement of  
771 amygdala corticosteroid receptors in visceral hyperalgesia following acute or repeated  
772 stress. *Am J Physiol Gastrointest Liver Physiol* 302, G260-266.
- 773 Norgren, R., Nishijo, H., and Travers, S.P. (1989). Taste responses from the entire  
774 gustatory apparatus. *Ann N Y Acad Sci* 575, 246-263; discussion 263-244.
- 775 Peng, Y., Gillis-Smith, S., Jin, H., Trankner, D., Ryba, N.J., and Zuker, C.S. (2015).  
776 Sweet and bitter taste in the brain of awake behaving animals. *Nature* 527, 512-515.
- 777 Penzo, M.A., Robert, V., and Li, B. (2014). Fear conditioning potentiates synaptic  
778 transmission onto long-range projection neurons in the lateral subdivision of central  
779 amygdala. *The Journal of neuroscience : the official journal of the Society for*  
780 *Neuroscience* 34, 2432-2437.



- 781 Penzo, M.A., Robert, V., Tucciarone, J., De Bundel, D., Wang, M., Van Aelst, L.,  
782 Darvas, M., Parada, L.F., Palmiter, R.D., He, M., *et al.* (2015). The paraventricular  
783 thalamus controls a central amygdala fear circuit. *Nature* 519, 455-459.
- 784 Petrovich, G.D., Ross, C.A., Mody, P., Holland, P.C., and Gallagher, M. (2009). Central,  
785 but not basolateral, amygdala is critical for control of feeding by aversive learned cues. *J*  
786 *Neurosci* 29, 15205-15212.
- 787 Radulovic, J., Kammermeier, J., and Spiess, J. (1998). Relationship between fos  
788 production and classical fear conditioning: effects of novelty, latent inhibition, and  
789 unconditioned stimulus preexposure. *The Journal of neuroscience : the official journal of*  
790 *the Society for Neuroscience* 18, 7452-7461.
- 791 Robinson, M.J., Warlow, S.M., and Berridge, K.C. (2014). Optogenetic excitation of  
792 central amygdala amplifies and narrows incentive motivation to pursue one reward above  
793 another. *J Neurosci* 34, 16567-16580.
- 794 Roesch, M.R., Esber, G.R., Li, J., Daw, N.D., and Schoenbaum, G. (2012). Surprise!  
795 Neural correlates of Pearce-Hall and Rescorla-Wagner coexist within the brain. *Eur J*  
796 *Neurosci* 35, 1190-1200.
- 797 Sadacca, B.F., Rothwax, J.T., and Katz, D.B. (2012). Sodium concentration coding gives  
798 way to evaluative coding in cortex and amygdala. *J Neurosci* 32, 9999-10011.
- 799 Sammons, J., Bass, C., Victor, J., and Di Lorenzo, P. (2016). Gustatory cortical input  
800 onto the nucleus of the solitary tract refines neuronal firing patterns and enhances  
801 learning in the awake rat. *Society for Neuroscience; 2016; San Diego, CA, USA.*
- 802 Samuelsen, C.L., and Fontanini, A. (2017). Processing of Intraoral Olfactory and  
803 Gustatory Signals in the Gustatory Cortex of Awake Rats. *J Neurosci* 37, 244-257.
- 804 Sato, M., Ito, M., Nagase, M., Sugimura, Y.K., Takahashi, Y., Watabe, A.M., and Kato,  
805 F. (2015). The lateral parabrachial nucleus is actively involved in the acquisition of fear  
806 memory in mice. *Mol Brain* 8, 22.
- 807 Seo, D.O., Funderburk, S.C., Bhatti, D.L., Motard, L.E., Newbold, D., Girven, K.S.,  
808 McCall, J.G., Krashes, M., Sparta, D.R., and Bruchas, M.R. (2016). A GABAergic  
809 Projection from the Centromedial Nuclei of the Amygdala to Ventromedial Prefrontal  
810 Cortex Modulates Reward Behavior. *J Neurosci* 36, 10831-10842.
- 811 Stephenson-Jones, M., Yu, K., Ahrens, S., Tucciarone, J.M., van Huijstee, A.N., Mejia,  
812 L.A., Penzo, M.A., Tai, L.H., Wilbrecht, L., and Li, B. (2016). A basal ganglia circuit for  
813 evaluating action outcomes. *Nature* 539, 289-293.
- 814 Taniguchi, H., He, M., Wu, P., Kim, S., Paik, R., Sugino, K., Kvitsiani, D., Fu, Y., Lu, J.,  
815 Lin, Y., *et al.* (2011). A resource of Cre driver lines for genetic targeting of GABAergic  
816 neurons in cerebral cortex. *Neuron* 71, 995-1013.

- 817 Vincis, R., and Fontanini, A. (2016). Associative learning changes cross-modal  
818 representations in the gustatory cortex. *Elife* 5.
- 819 Wilensky, A.E., Schafe, G.E., Kristensen, M.P., and LeDoux, J.E. (2006). Rethinking the  
820 fear circuit: the central nucleus of the amygdala is required for the acquisition,  
821 consolidation, and expression of Pavlovian fear conditioning. *The Journal of*  
822 *neuroscience : the official journal of the Society for Neuroscience* 26, 12387-12396.
- 823 Yamamoto, T., Yuyama, N., Kato, T., and Kawamura, Y. (1985). Gustatory responses of  
824 cortical neurons in rats. II. Information processing of taste quality. *J Neurophysiol* 53,  
825 1356-1369.
- 826 Yasoshima, Y., and Yamamoto, T. (1998). Short-term and long-term excitability changes  
827 of the insular cortical neurons after the acquisition of taste aversion learning in behaving  
828 rats. *Neuroscience* 84, 1-5.
- 829 Yu, K., Ahrens, S., Zhang, X., Schiff, H., Ramakrishnan, C., Fenno, L., Deisseroth, K.,  
830 Zhou, P., Paninski, L., and Li, B. (2017). The central amygdala controls learning in the  
831 lateral amygdala. bioRxiv 126649; doi: <https://doi.org/10.1101/126649>.
- 832 Yu, K., Garcia da Silva, P., Albeanu, D.F., and Li, B. (2016). Central Amygdala  
833 Somatostatin Neurons Gate Passive and Active Defensive Behaviors. *J Neurosci* 36,  
834 6488-6496.
- 835 Zhang, F., Wang, L.P., Boyden, E.S., and Deisseroth, K. (2006). Channelrhodopsin-2 and  
836 optical control of excitable cells. *Nat Methods* 3, 785-792.
- 837

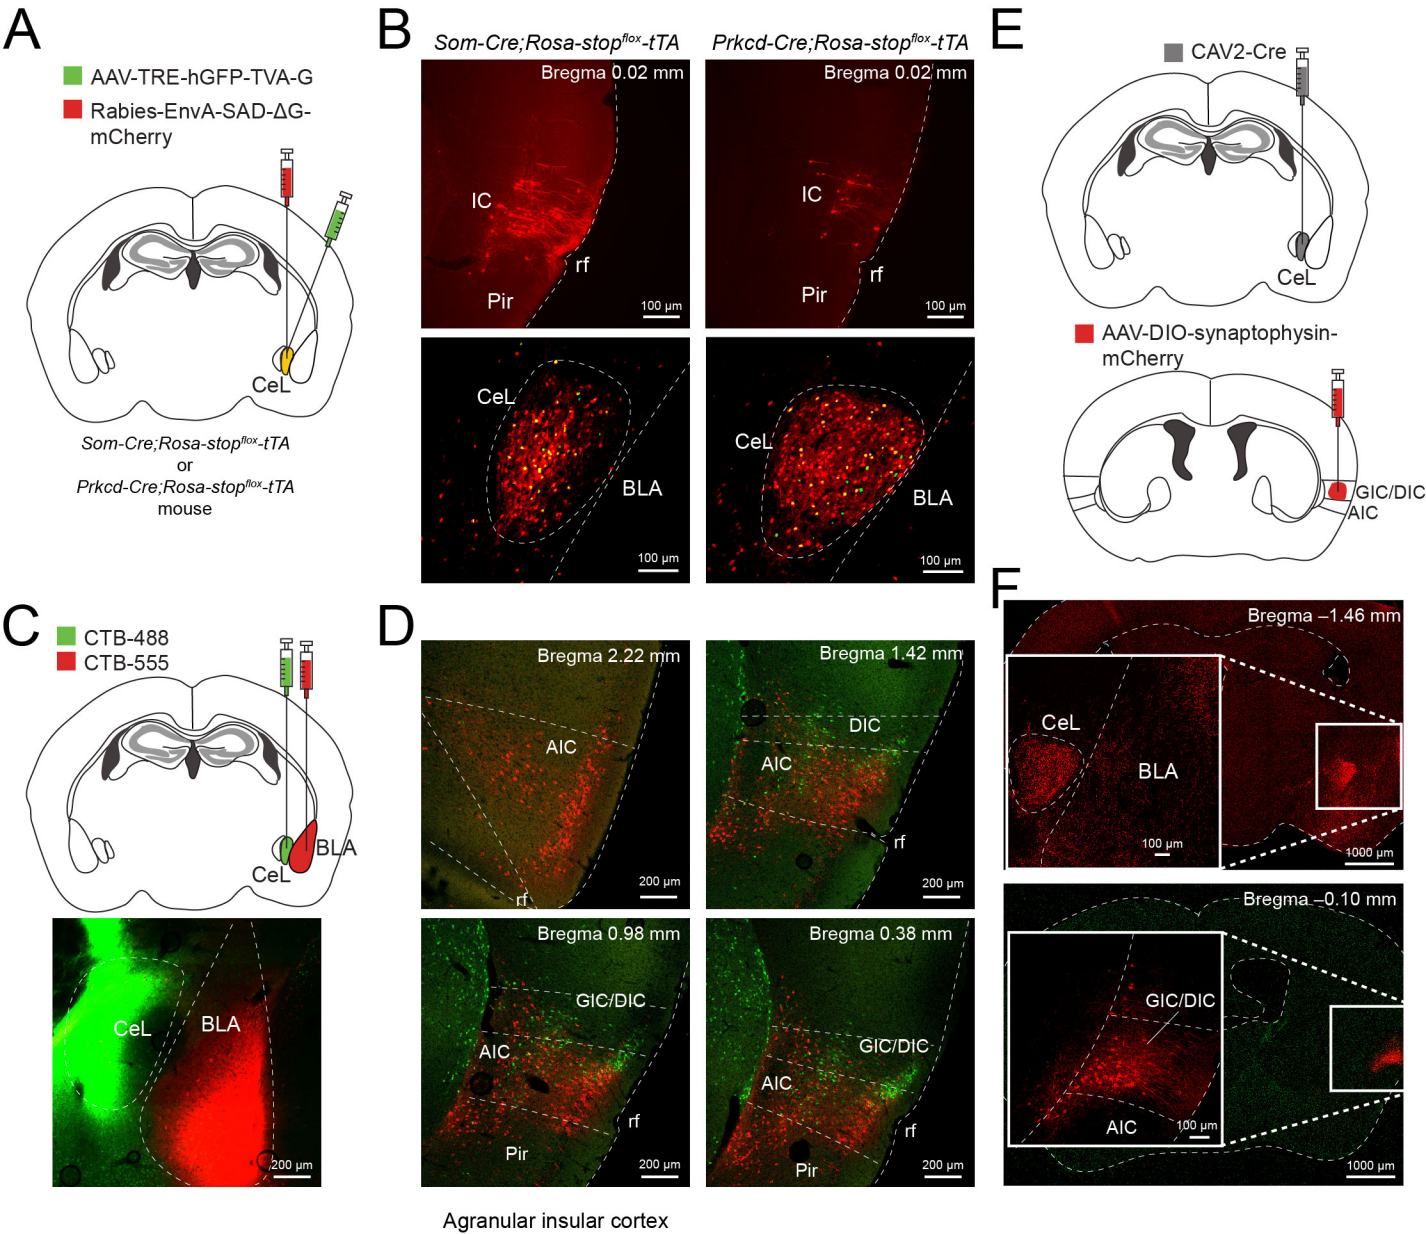

Figure 1

**A**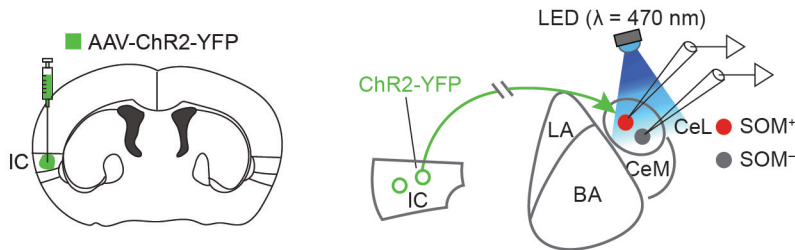**B**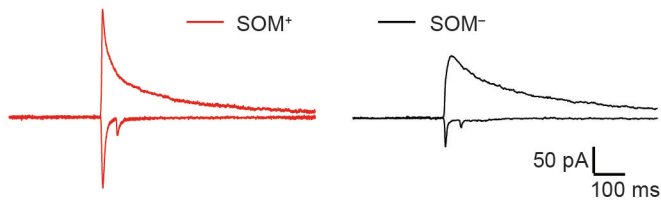**C**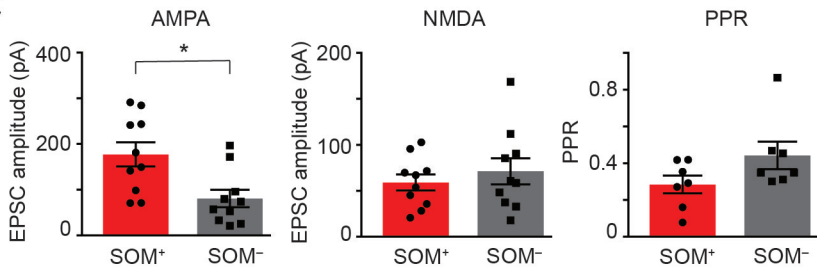**Figure 2**

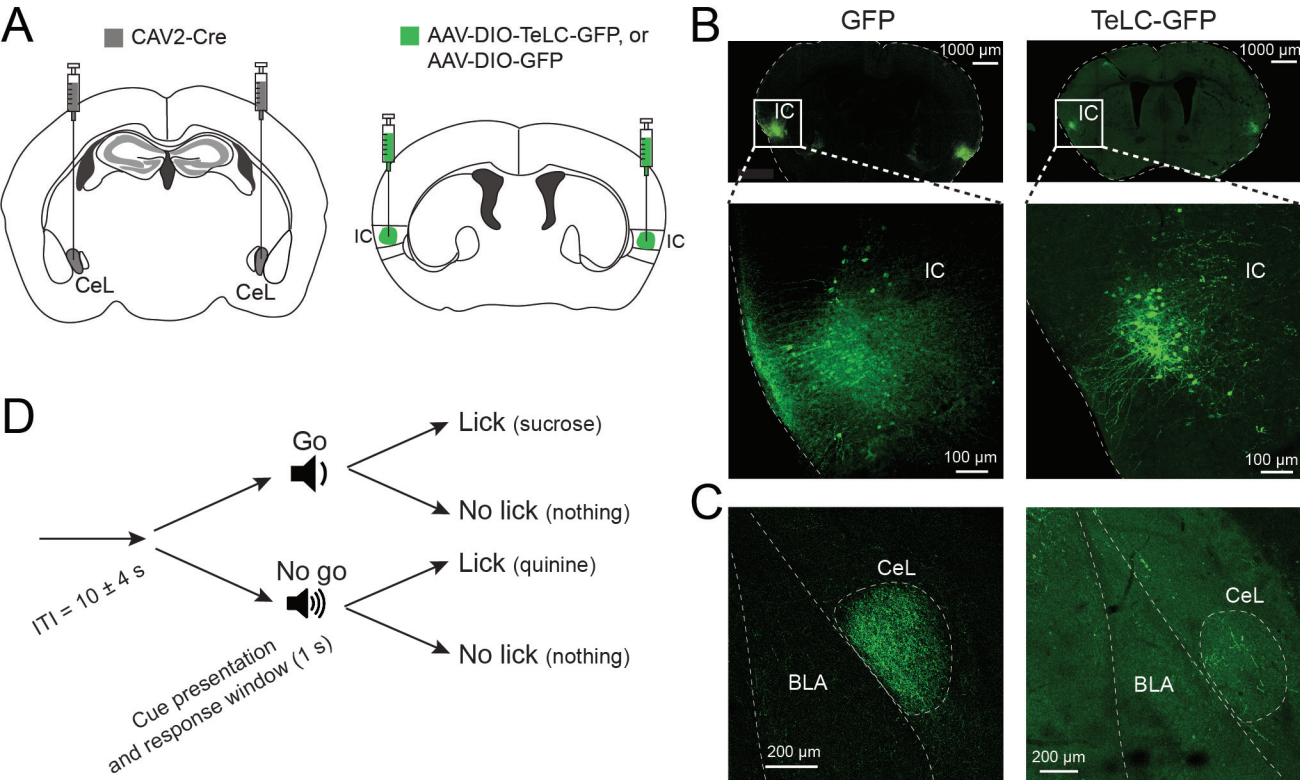

Figure 3

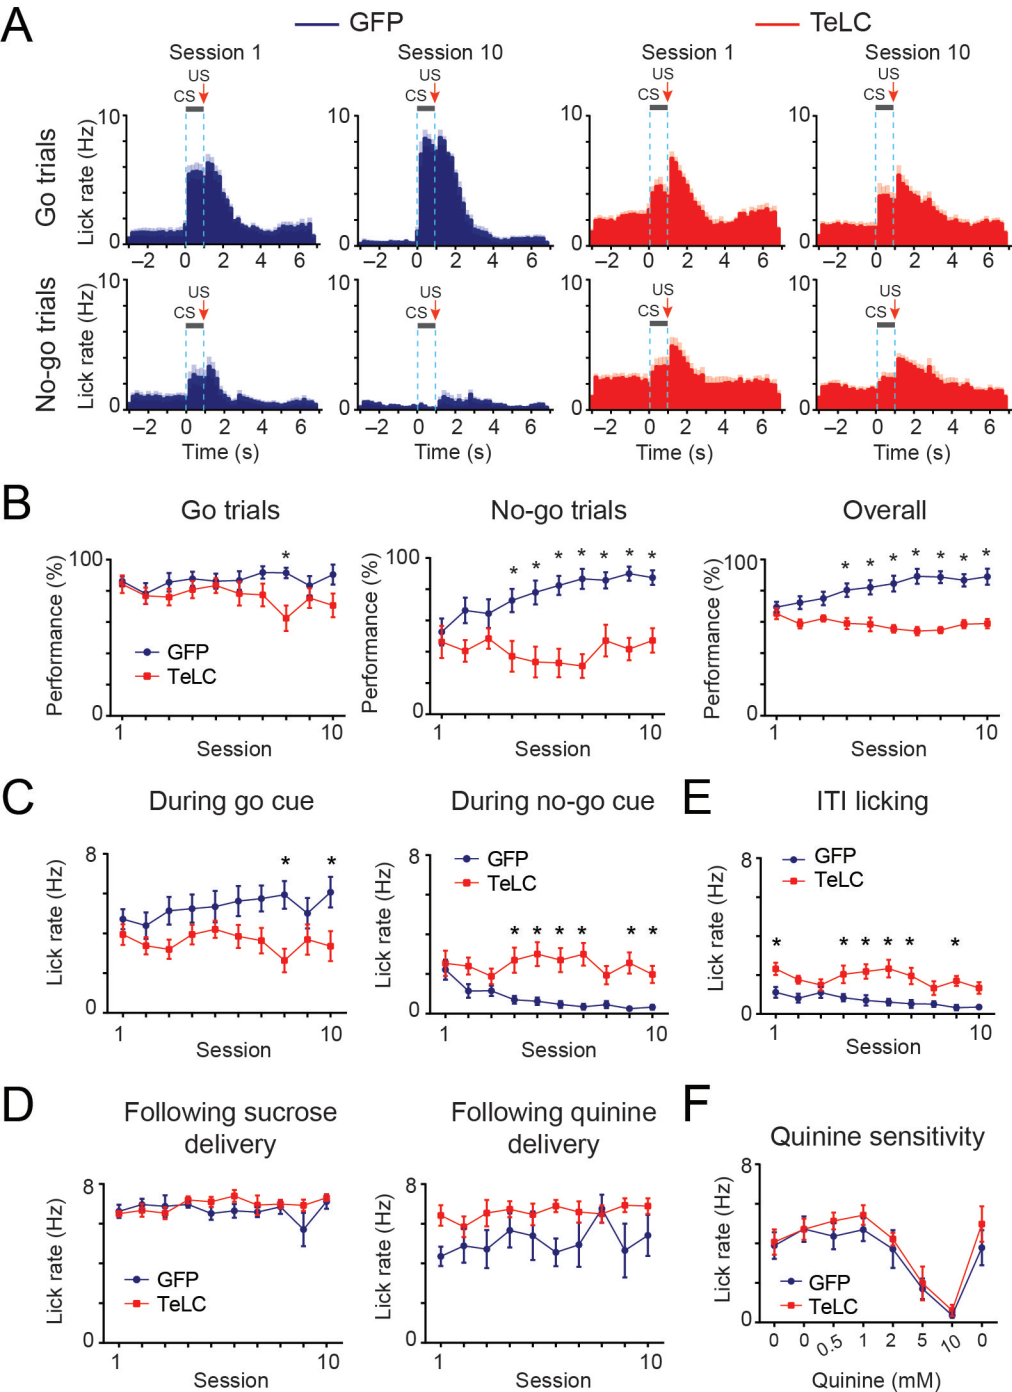

Figure 4

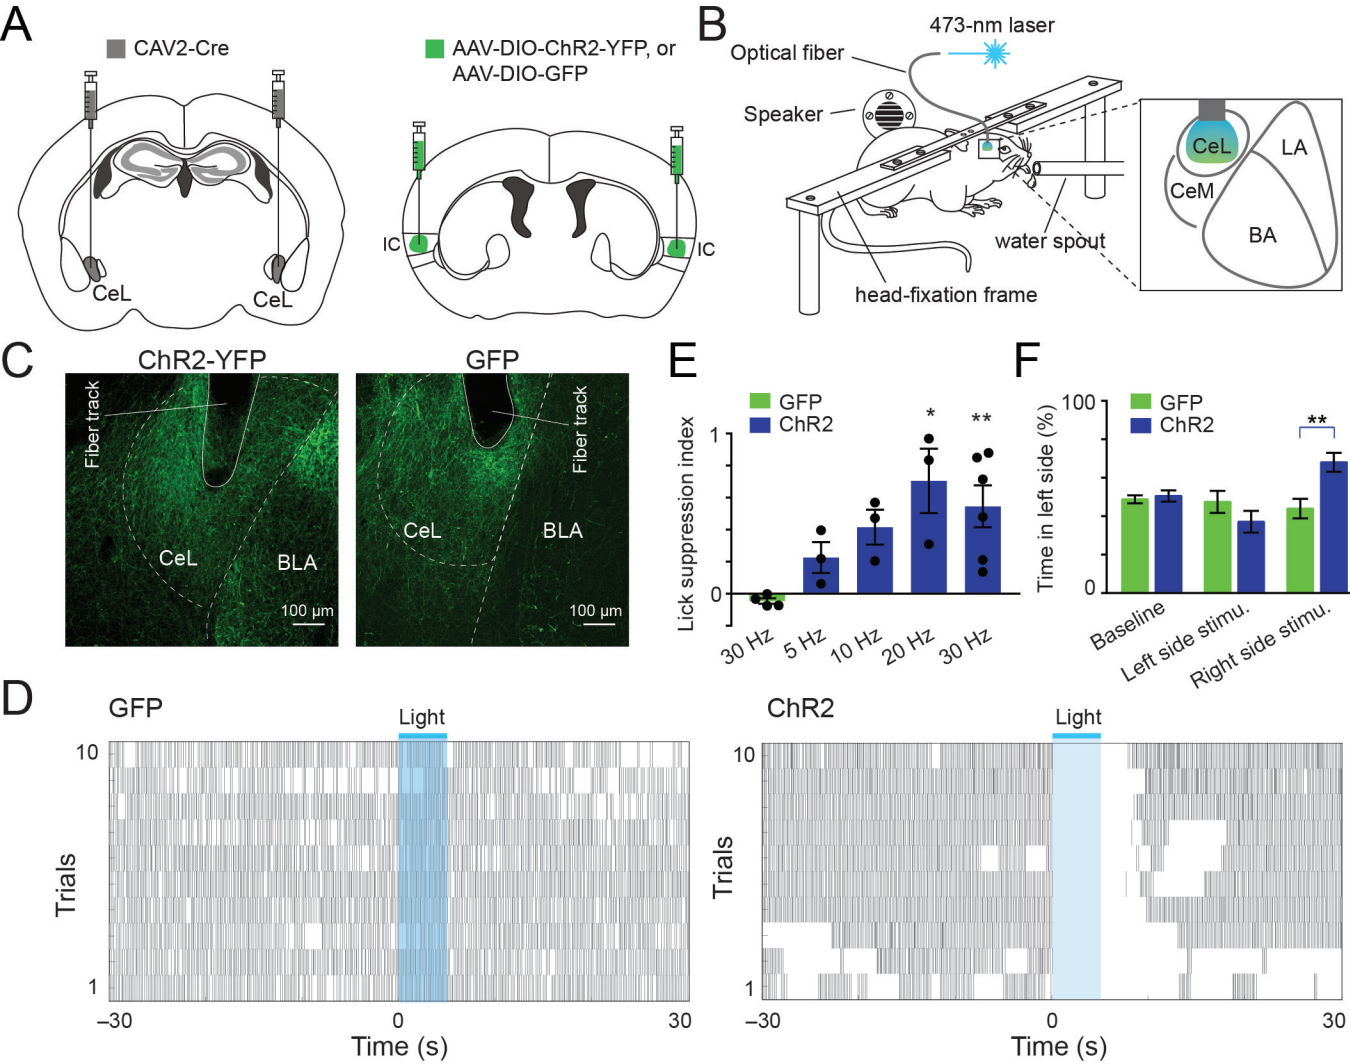

Figure 5

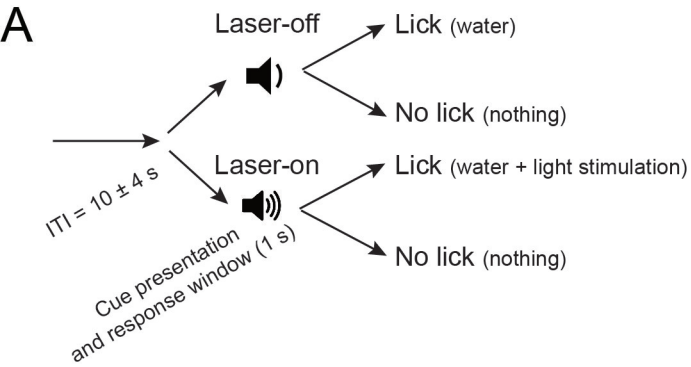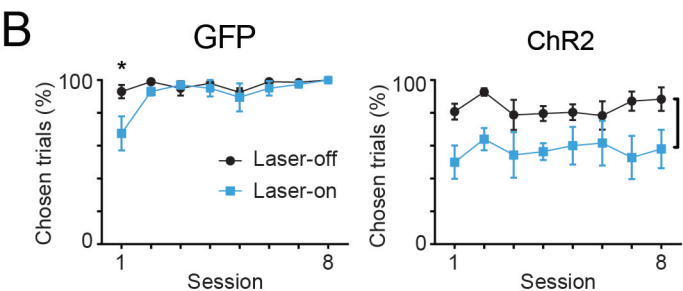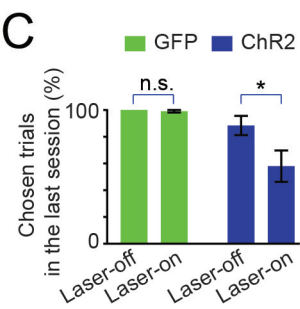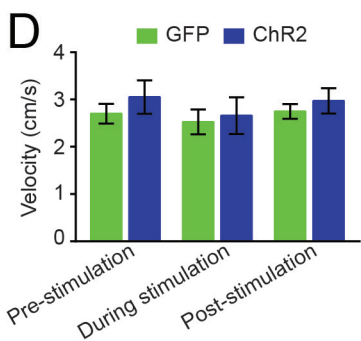

**Figure 6**
